# Supplementary material for: A Retrospective Study of Korean Adults With Food Allergy: Differences in Phenotypes and Causes
Source: PubMed Central journal article supplement — Allergy Asthma Immunol Res. 2017 Aug 17;9(6):534–9. doi: 10.4168/aair.2017.9.6.534 (PMC5603482; doi:10.4168/aair.2017.9.6.534), 2017-08-17
Supplement: aair-9-534-s001.pdf [file aair-9-534-s001.pdf]

**Supplementary Table 1.** Specific IgE detection rate according to causative food allergen

| Causative food          | Total number of events | Number of events positive to Immuno CAP |              | Number of events positive to SPT |
|-------------------------|------------------------|-----------------------------------------|--------------|----------------------------------|
|                         |                        | ≥0.35 KU/L                              | ≥0.1 KU/L    |                                  |
| Plants                  | 81                     | 16/35 (45.7)                            | 21/35 (60)   | 7/47 (14.9)                      |
| Fruits*                 | 26                     | 3/3 (100)                               | 3/3 (100)    | 1/10 (10)                        |
| Grains                  | 22                     | 11/19 (57.9)                            | 13/19 (68.4) | 4/22 (18.2)                      |
| NBS                     | 21                     | 2/13 (15.4)                             | 5/13 (38.5)  | 2/13 (15.4)                      |
| Vegetables <sup>†</sup> | 12                     | 0                                       | 0            | 0                                |
| Seafood                 | 63                     | 19/31 (61.3)                            | 20/31 (64.5) | 7/38 (18.4)                      |
| Crustacean              | 30                     | 17/23 (73.9)                            | 18/23 (78.3) | 6/33 (18.2)                      |
| Non-Crustacean          | 33                     | 2/8 (25)                                | 2/8 (25)     | 1/5 (20)                         |
| Meat                    | 24                     | 0/15                                    | 1/15 (6.7)   | 0/22                             |
| Milk                    | 5                      | 1/4 (25)                                | 1/4 (25)     | 0/3                              |
| Egg                     | 3                      | 0/2                                     | 1/2 (50)     | 0/3                              |
| Others                  | 5                      | 0                                       | 0            |                                  |

Values are presented as n (%). Specific IgE detection rates were calculated as follows: the number of events that showed positive / the number of events that immunologic evaluation to causative allergens were performed.

\*17 were positive to birch pollen and 1 was positive to mugwort pollen; <sup>†</sup>4 were positive to birch pollen and 5 were positive to mugwort pollen.
